# Supplementary material
Source: publisher figshare collection journal article supplement (https://gsajournals.figshare.com/ndownloader/files/14675432)
Supplement: Supplementary file 1 [file 14675432]

## Sheet: Center
#1_01-18-16
Frame	time, sec	F total
30	0.031	475076
31	0.062	469652
32	0.093	462122
33	0.124	453108
34	0.155	450497
35	0.186	445364
36	0.217	439039
37	0.248	436566
38	0.279	433153
39	0.31	430517
40	0.341	426722
41	0.372	422223
42	0.403	438631
43	0.434	477760
44	0.465	519587
45	0.496	555376
46	0.527	584402
47	0.558	606898
48	0.589	616608
49	0.62	635257
50	0.651	649305
51	0.682	639025
52	0.713	622973
53	0.744	600687
54	0.775	584538
55	0.806	570573
56	0.837	554075
57	0.868	543477
58	0.899	531671
59	0.93	519815
60	0.961	506875
61	0.992	497689
62	1.023	506809
63	1.054	541485
64	1.085	593674
65	1.116	636658
66	1.147	671891
67	1.178	706547
68	1.209	711347
69	1.24	736409
70	1.271	730230
71	1.302	709768
72	1.333	689677
73	1.364	666388
74	1.395	648277
75	1.426	622792
76	1.457	605384
77	1.488	591721
78	1.519	573394
79	1.55	560273
80	1.581	544434
81	1.612	534284
82	1.643	521933
83	1.674	510052
84	1.705	499083
85	1.736	490532
86	1.767	480687
87	1.798	474324
88	1.829	465417
89	1.86	458864
90	1.891	452218
91	1.922	446928
92	1.953	441466
93	1.984	436287
94	2.015	431126
95	2.046	428527
96	2.077	424936
97	2.108	427918
98	2.139	425519
99	2.17	421055
100	2.201	421504
101	2.232	418438
102	2.263	417406
103	2.294	409994
104	2.325	404267
105	2.356	397950
106	2.387	391847
107	2.418	389669
108	2.449	384692
109	2.48	385413
110	2.511	382465
111	2.542	381659
112	2.573	379893
113	2.604	380817
114	2.635	381425
115	2.666	386609
116	2.697	385869
117	2.728	391401
118	2.759	390297
119	2.79	392086
120	2.821	392452
121	2.852	393636
122	2.883	406928
123	2.914	444354
124	2.945	489092
125	2.976	536506
126	3.007	568618
127	3.038	596183
128	3.069	608852
129	3.1	628263
130	3.131	639465
131	3.162	631235
132	3.193	616288
133	3.224	600102
134	3.255	584291
135	3.286	570029
136	3.317	557826
137	3.348	549103
138	3.379	532687
139	3.41	536192
140	3.441	567914
141	3.472	611709
142	3.503	659086
143	3.534	692522
144	3.565	724977
145	3.596	755123
146	3.627	756379
147	3.658	783976
148	3.689	763255
149	3.72	734970
150	3.751	711257
151	3.782	692386
152	3.813	670836
153	3.844	648854
154	3.875	628189
155	3.906	608316
156	3.937	596481
157	3.968	580703
158	3.999	562629
159	4.03	549605
160	4.061	537745
161	4.092	528844
162	4.123	515710
163	4.154	505609
164	4.185	498443
165	4.216	489050
166	4.247	482521
167	4.278	477410
168	4.309	465723
169	4.34	462085
170	4.371	454026
171	4.402	450731
172	4.433	453568
173	4.464	485731
174	4.495	537651
175	4.526	585755
176	4.557	625905
177	4.588	660976
178	4.619	686033
179	4.65	706867
180	4.681	712235
181	4.712	710503
182	4.743	692224
183	4.774	666494
184	4.805	648682
185	4.836	636797
186	4.867	621516
187	4.898	605696
188	4.929	600630
189	4.96	633361
190	4.991	684289
191	5.022	729041
192	5.053	784045
193	5.084	809213
194	5.115	814499
195	5.146	834558
196	5.177	825046
197	5.208	805345
198	5.239	776290
199	5.27	747828
200	5.301	721852
201	5.332	696541
202	5.363	674450
203	5.394	654783
204	5.425	638593
205	5.456	618707
206	5.487	601975
207	5.518	583642
208	5.549	567360
209	5.58	550804
210	5.611	542841
211	5.642	532642
212	5.673	532769
213	5.704	529645
214	5.735	521558
215	5.766	517777
216	5.797	511117
217	5.828	503921
218	5.859	496948
219	5.89	490867
220	5.921	485722
221	5.952	481480
222	5.983	474018
223	6.014	467150
224	6.045	462077
225	6.076	464943
226	6.107	494578
227	6.138	547084
228	6.169	604987
229	6.2	653167
230	6.231	704930
231	6.262	741719
232	6.293	741317
233	6.324	748649
234	6.355	733725
235	6.386	712434
236	6.417	684554
237	6.448	664913
238	6.479	645082
239	6.51	621906
240	6.541	609265
241	6.572	592054
242	6.603	574971
243	6.634	561423
244	6.665	550308
245	6.696	543634
246	6.727	551057
247	6.758	556788
248	6.789	557210
249	6.82	554991
250	6.851	548058
251	6.882	537904
252	6.913	524950
253	6.944	513514
254	6.975	503394
255	7.006	491509
256	7.037	487675
257	7.068	487349
258	7.099	481389
259	7.13	474841
260	7.161	470275
261	7.192	459681
262	7.223	452537
263	7.254	446540
264	7.285	449162
265	7.316	489169
266	7.347	542083
267	7.378	594181
268	7.409	635854
269	7.44	662066
270	7.471	694984
271	7.502	716527
272	7.533	718059
273	7.564	723978
274	7.595	701840
275	7.626	684955
276	7.657	698277
277	7.688	730737
278	7.719	772885
279	7.75	806218
280	7.781	839320
281	7.812	832811
282	7.843	831285
283	7.874	818800
284	7.905	788498
285	7.936	759287
286	7.967	762871
287	7.998	780030
288	8.029	806789
289	8.06	830591
290	8.091	849105
291	8.122	853903
292	8.153	849473
293	8.184	837489
294	8.215	849616
295	8.246	823104
296	8.277	785799
297	8.308	757770
298	8.339	768447
299	8.37	789187
300	8.401	813665

## Sheet: Posterior
Frame	time, sec	F total
30	0.031	494980
31	0.062	492339
32	0.093	485844
33	0.124	475310
34	0.155	470132
35	0.186	466709
36	0.217	461266
37	0.248	459564
38	0.279	453442
39	0.31	451751
40	0.341	449030
41	0.372	444359
42	0.403	455624
43	0.434	475019
44	0.465	502296
45	0.496	537102
46	0.527	574232
47	0.558	618924
48	0.589	648869
49	0.62	656789
50	0.651	653454
51	0.682	651729
52	0.713	640647
53	0.744	621080
54	0.775	605529
55	0.806	591711
56	0.837	575911
57	0.868	563578
58	0.899	551639
59	0.93	539736
60	0.961	526534
61	0.992	515983
62	1.023	518107
63	1.054	531982
64	1.085	576668
65	1.116	611775
66	1.147	639027
67	1.178	675032
68	1.209	703040
69	1.24	715940
70	1.271	713670
71	1.302	707613
72	1.333	699493
73	1.364	683552
74	1.395	671883
75	1.426	650748
76	1.457	635265
77	1.488	624053
78	1.519	606152
79	1.55	594293
80	1.581	580503
81	1.612	571253
82	1.643	561570
83	1.674	551482
84	1.705	540921
85	1.736	535883
86	1.767	526563
87	1.798	522479
88	1.829	516287
89	1.86	511920
90	1.891	510117
91	1.922	507346
92	1.953	505524
93	1.984	501560
94	2.015	497091
95	2.046	494722
96	2.077	495799
97	2.108	519478
98	2.139	528595
99	2.17	529010
100	2.201	530145
101	2.232	528823
102	2.263	532622
103	2.294	532965
104	2.325	535527
105	2.356	537043
106	2.387	531384
107	2.418	523299
108	2.449	505266
109	2.48	492127
110	2.511	480938
111	2.542	474270
112	2.573	466713
113	2.604	456235
114	2.635	447982
115	2.666	444361
116	2.697	438778
117	2.728	439896
118	2.759	436543
119	2.79	435230
120	2.821	432215
121	2.852	431963
122	2.883	441077
123	2.914	460673
124	2.945	480976
125	2.976	509333
126	3.007	535301
127	3.038	570271
128	3.069	606757
129	3.1	630032
130	3.131	643218
131	3.162	643991
132	3.193	642269
133	3.224	633691
134	3.255	623316
135	3.286	614931
136	3.317	605565
137	3.348	600252
138	3.379	583918
139	3.41	585287
140	3.441	597977
141	3.472	615956
142	3.503	646975
143	3.534	669245
144	3.565	693303
145	3.596	725220
146	3.627	751829
147	3.658	758723
148	3.689	745174
149	3.72	734198
150	3.751	724770
151	3.782	714966
152	3.813	701975
153	3.844	685869
154	3.875	674335
155	3.906	660920
156	3.937	654594
157	3.968	645265
158	3.999	632908
159	4.03	624860
160	4.061	618862
161	4.092	613217
162	4.123	600479
163	4.154	589927
164	4.185	584064
165	4.216	580137
166	4.247	577983
167	4.278	581739
168	4.309	573978
169	4.34	574990
170	4.371	569349
171	4.402	567973
172	4.433	577978
173	4.464	603501
174	4.495	636136
175	4.526	675234
176	4.557	707410
177	4.588	744854
178	4.619	779925
179	4.65	810274
180	4.681	831377
181	4.712	820107
182	4.743	809323
183	4.774	792285
184	4.805	784379
185	4.836	776999
186	4.867	762156
187	4.898	748141
188	4.929	746742
189	4.96	770572
190	4.991	795068
191	5.022	828239
192	5.053	886546
193	5.084	915204
194	5.115	945327
195	5.146	973880
196	5.177	973944
197	5.208	977075
198	5.239	957192
199	5.27	937405
200	5.301	915161
201	5.332	890636
202	5.363	866913
203	5.394	846927
204	5.425	830166
205	5.456	809938
206	5.487	793795
207	5.518	769575
208	5.549	752403
209	5.58	732578
210	5.611	720228
211	5.642	718616
212	5.673	726275
213	5.704	729110
214	5.735	723905
215	5.766	720457
216	5.797	716050
217	5.828	703871
218	5.859	696301
219	5.89	689146
220	5.921	682461
221	5.952	676980
222	5.983	665181
223	6.014	655813
224	6.045	648013
225	6.076	653044
226	6.107	680156
227	6.138	706687
228	6.169	741502
229	6.2	776179
230	6.231	810647
231	6.262	850493
232	6.293	860454
233	6.324	864390
234	6.355	858166
235	6.386	852223
236	6.417	843241
237	6.448	830036
238	6.479	813926
239	6.51	794139
240	6.541	784214
241	6.572	769447
242	6.603	751948
243	6.634	736981
244	6.665	725244
245	6.696	718862
246	6.727	724955
247	6.758	723530
248	6.789	722715
249	6.82	725229
250	6.851	721027
251	6.882	714360
252	6.913	700013
253	6.944	689123
254	6.975	677782
255	7.006	666812
256	7.037	669551
257	7.068	681881
258	7.099	680729
259	7.13	671595
260	7.161	665954
261	7.192	647446
262	7.223	632244
263	7.254	619393
264	7.285	621914
265	7.316	653253
266	7.347	682943
267	7.378	718234
268	7.409	753209
269	7.44	779215
270	7.471	823253
271	7.502	859207
272	7.533	872588
273	7.564	872696
274	7.595	862738
275	7.626	860251
276	7.657	886303
277	7.688	909749
278	7.719	945556
279	7.75	975869
280	7.781	1011234
281	7.812	1016490
282	7.843	1016813
283	7.874	999429
284	7.905	980494
285	7.936	968334
286	7.967	983736
287	7.998	1006996
288	8.029	1036924
289	8.06	1066257
290	8.091	1101564
291	8.122	1119170
292	8.153	1133490
293	8.184	1117613
294	8.215	1102066
295	8.246	1084783
296	8.277	1049233
297	8.308	1032664
298	8.339	1058681
299	8.37	1097568
300	8.401	1140274
